## CORRECTION

# Correction: ISED: Constructing a high-resolution elevation road dataset from massive, low-quality in-situ observations derived from geosocial fitness tracking data

Grant McKenzie, Krzysztof Janowicz

## Notice of republication

An incorrect version of Fig 2 was published in error. This article was republished on October 28, 2019 to correct for this error. Please download this article again to view the correct version.

## Reference

1. McKenzie G, Janowicz K (2017) ISED: Constructing a high-resolution elevation road dataset from massive, low-quality in-situ observations derived from geosocial fitness tracking data. PLoS ONE 12(10): e0186474. <https://doi.org/10.1371/journal.pone.0186474> PMID: 29028828

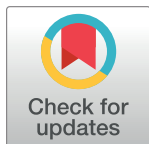

## OPEN ACCESS

**Citation:** McKenzie G, Janowicz K (2019)

Correction: ISED: Constructing a high-resolution elevation road dataset from massive, low-quality in-situ observations derived from geosocial fitness tracking data. PLoS ONE 14(11): e0225557.

<https://doi.org/10.1371/journal.pone.0225557>

**Published:** November 14, 2019

**Copyright:** © 2019 McKenzie, Janowicz. This is an open access article distributed under the terms of the [Creative Commons Attribution License](https://creativecommons.org/licenses/by/4.0/), which permits unrestricted use, distribution, and reproduction in any medium, provided the original author and source are credited.
